# Supplementary material for: Intramolecular conformational control in a cyclic peptide composed of alternating l-proline and substituted 3-aminobenzoic acid subunits
Source: Royal Society of Chemistry journal article supplement (doi:10.1039/b000568l), 2000-01-01
Supplement: b000568l.doc [file b000568l.doc]

*Chem. Commun.*

# Intramolecular conformational control in a cyclic peptide composed of alternating (L)-proline and substituted 3-aminobenzoic acid subunits

Stefan Kubik,*a Richard Goddardb

*aInstitut für Organische Chemie und Makromolekulare Chemie, Heinrich-Heine-Universität, Universitätsstr. 1, D-40225 Düsseldorf, Germany, E-mail: kubik@uni-duesseldorf.de*

*bMax-Planck-Institut für Kohlenforschung, Kaiser-Wilhelm-Platz 1, D-45470 Mülheim/Ruhr, Germany.*

Structure of compound **2**:

Synthesis of compound **2**:

FT-IR spectrum: **2** in 1% [d6]DMSO/CDCl3 (c = 2mM)

Temperature-dependent NMR spectroscopy: **2** in C2D2Cl4 (Varian VXR 300 / 300 MHz)

NMR dilution titration: **2** in CDCl3 (a) 2mM, (b) 1 mM, (c) 0.1 mM, (d) 0.02 mM (Bruker DRX 500 / 500 MHz)

NOESY NMR spectrum: **2** + 4 eq. BTMA+ picrate in CDCl3 (mixing time 300 ms) (Bruker DRX 500 / 500 MHz)
